# Supplementary material for: Integrative Gene Expression and Metabolic Analysis Tool IgemRNA
Source: MDPI journal article supplement (doi:10.3390/biom12040586), 2022-04-16
Supplement: s1 [file s1]

## Supplementary file S2

## Supplementary file S2

### User manual documentation for the IgemRNA

*IgemRNA* is a library with a graphical user interface written for the MATLAB environment and facilitates some of the Cobra Toolbox 3.0 functionality. *IgemRNA* performs not only Gene sets enrichment analysis-based functions, but also allows integrate transcriptomics data in metabolic models. Also, *IgemRNA* allows validate transcriptomics data facilitating interconnectivity of biochemical networks, steady state assumptions, Gene - Protein - Reaction relationship and can use optional medium composition data to create context-specific models.

#### 1. Folder structure description

Files are extracted from the archive (<https://github.com/BigDataInSilicoBiologyGroup/IgemRNA>). The *IgemRNA* tool consists of four root folders (*Data*, *Scripts* and *Results non-optimization*, *Results post-optimization*) and an *IgemRNA.m* file which calls the user graphical interface form. Data folder is where the input data files are stored, initially this folder contains the data files used for this demonstration:

- MediumData.xlsx (medium composition data);
- Yeast\_8\_4\_0.xls (the yeast consensus genome-scale model)
- TranscriptomicsData.xlsx (RNA-seq measurements) (available <https://www.ncbi.nlm.nih.gov/geo/query/acc.cgi?acc=GSE130549>)

Transcriptomics data and medium composition data can be provided as an .xls or an .xlsx file and must meet the following format (Figure S1) where shown columns are provided and named accordingly and sheet names correspond to a phenotype name see 3.2 *IgemRNA* demonstration.

| ▲                               | A          | B          | C          | D | ▲                               | A         | B    | C | D | E |
|---------------------------------|------------|------------|------------|---|---------------------------------|-----------|------|---|---|---|
| 1                               | ReactionId | LowerBound | UpperBound |   | 1                               | Geneid    | Data |   |   |   |
| 2                               | r_1714     | -15        | -0,01      |   | 2                               | YDL248W   | 1    |   |   |   |
| 3                               | r_1761     | 8          | 12         |   | 3                               | YDL247W-A | 0    |   |   |   |
| 4                               |            |            |            |   | 4                               | YDL247W   | 0    |   |   |   |
| 5                               |            |            |            |   | 5                               | YDL246C   | 5    |   |   |   |
| 6                               |            |            |            |   | 6                               | YDL245C   | 10   |   |   |   |
| 7                               |            |            |            |   | 7                               | YDL244W   | 6    |   |   |   |
| 8                               |            |            |            | A | 8                               | YDL243C   | 25   |   |   | B |
| 9                               |            |            |            |   | 9                               | YDL242W   | 64   |   |   |   |
| 10                              |            |            |            |   |                                 |           |      |   |   |   |
| ◀ ▶ SRR8994357_WT SRR8994358_WT |            |            |            |   | ◀ ▶ SRR8994357_WT SRR8994358_WT |           |      |   |   |   |

**Figure S1.** Input data file structure; (A) Medium data file structure;  
(B) Transcriptomics data file structure.

The model can be provided in xls, sbml or other formats supported by Cobra Toolbox 3.0.

Scripts folder consists of all the script files that are being executed by the *IgemRNA* tool according to user's selections in the *IgemRNA* form as well as the test cases provided in this demonstration. The Results non-optimization and Results post-optimization folders are where all the result files are being saved. These folders are initially empty (for more details see section in main publication Materials and Methods 2.2 Tools functionality description).

## Supplementary file S2

### 2. Starting *IgemRNA* tool

In order to start the *IgemRNA* tool a user must start the MATLAB environment and run the *IgemRNA.m* script located in the root folder. This script opens the graphical user interface of *IgemRNA* (Figure S2).

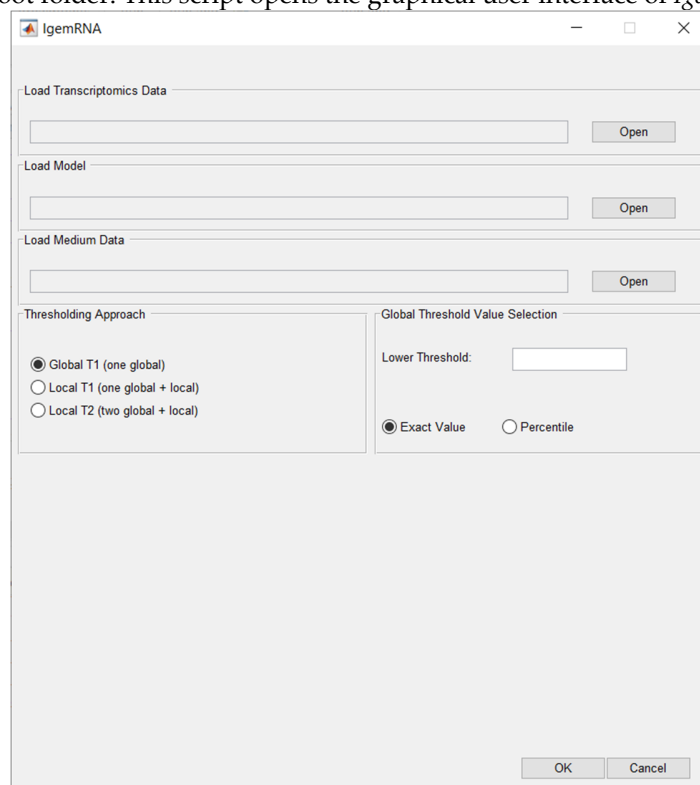

**Figure S2.** IgemRNA start window.

### 3. File upload

To access all options in the *IgemRNA* form, the user must supply input data files Figure S3A section. This can be done by pressing the 'Open' button in the corresponding file row and finding the necessary files via File Explorer. Transcriptomics data is required to run non-optimization tasks (Figure S3F) but an additional model file is necessary to access the post-optimization tasks (Figure S3G). Medium composition file is optional if such data is available, the selection of this data file does not extend the form, but specifies the given exchange reaction constraints (upper bounds and lower bounds) on the model for post-optimization tasks analysis. For an organized overview of the analysis and results it is recommended that the necessary data files are located in the Data folder of *IgemRNA* tool (for more details see main publication section Materials and Methods 2.2 Tools functionality description).

Supplementary file S2

The screenshot shows the IgemRNA application window with several sections highlighted by blue boxes and letters A through G:

- A:** Load Transcriptomics Data section with a file path and an 'Open' button.
- B:** Load Model section with a file path and an 'Open' button.
- C:** Load Medium Data section with a file path and an 'Open' button.
- D:** Thresholding Approach section with radio buttons for Global T1, Local T1, and Local T2.
- E:** Global Threshold Value Selection section with input fields for Lower and Upper Thresholds, and radio buttons for Exact Value and Percentile.
- F:** Gene Mapping Approach (AND/OR) section with radio buttons for Min/Max, GM/Max, Min/Sum, and GM/Sum.
- G:** Constraining Options section with checkboxes for Only irreversible reactions, Growth not affecting gene deletion only, and Meet minimum growth requirements.
- H:** Non-optimization Tasks section with checkboxes for Filter highly and lowly expressed genes, Filter lowly expressed genes, and Filter up/down-regulated genes between phenotypes.
- I:** Post-optimization Tasks section with checkboxes for Use existing context-specific models, Filter non-flux reactions, Filter rate limiting reactions, and Calculate flux shifts between phenotypes.

At the bottom, there are 'OK' and 'Close' buttons.

Figure S3. Full *IgemRNA* form

4. Running test cases

In order to perform test cases provided in this user manual, simply run the provided test case scripts via MATLAB environment having initialized CobraToolbox 3.0 beforehand. Test case script file names are given at the end of each test case section.

5. Non-optimization tasks

Non-optimization tasks include several transcriptomics data analysis tasks: filter highly and lowly expressed genes, filter lowly expressed genes, filter up/down regulated genes between different phenotypes or data sets. The results for each task are stored in a different folder within the *Results non-optimization* folder: *Gene expression level comparison*, *Highly-lowly expressed genes*, *Lowly expressed genes* (Figure S4).

| « Documents > IgemRNA > Results non-optimization |                  |
|--------------------------------------------------|------------------|
| Name                                             | Date modified    |
| Gene expression level comparison                 | 17.07.2021 09:33 |
| Highly-lowly expressed genes                     | 17.07.2021 09:32 |
| Lowly expressed genes                            | 17.07.2021 09:33 |

Figure S4. Non-optimization results folder

## Supplementary file S2

### 5.1. Filter highly and lowly expressed genes

Non-optimization task *Filter highly and lowly expressed genes* generates result excel files for each provided transcriptomics data set. File names are assigned based on the provided dataset and phenotype name (from transcriptomics data), the selected thresholding approach (GT1, LT1, LT2) and provided global thresholds values (Figure S5).

| « Results non-optimization » Highly-lowly expressed genes                                                     |                  |
|---------------------------------------------------------------------------------------------------------------|------------------|
| Name                                                                                                          | Date modified    |
|  SRR8994357_WT_LT1_30.xls    | 22.07.2021 09:09 |
|  SRR8994358_WT_LT1_30.xls    | 22.07.2021 09:09 |
|  SRR8994359_WT_LT1_30.xls    | 22.07.2021 09:09 |
|  SRR8994378_S47D_LT1_30.xls  | 22.07.2021 09:33 |
|  SRR8994379_S47D_LT1_30.xls  | 22.07.2021 09:09 |
|  SRR8994380_S47D_LT1_30.xls | 22.07.2021 09:09 |

**Figure S5.** Highly-lowly expressed genes folder

Each excel file contains one sheet with the list of genes provided by transcriptomics data and 4 columns: *GeneId*, *Data* (the expression value), *ExpressionLevel* and *ThApplied*. The *ExpressionLevel* column contains the expression levels determined based on the chosen thresholding approach, provided global and for thresholding approaches (LT1 and LT2) calculated local thresholds. Column *ThApplied* displays whether a local or a global threshold for a specific gene was applied (Figure S6).

|      | A         | B     | C               | D         |
|------|-----------|-------|-----------------|-----------|
| 1    | GeneId    | Data  | ExpressionLevel | ThApplied |
| 2201 | Q0275     | 0     | Low             | Global    |
| 2202 | tM(CAU)Q2 | 0     | Low             | Global    |
| 2203 | Q0285     | 0     | Low             | Global    |
| 2204 | Q0297     | 0     | Low             | Global    |
| 2205 | YDL245C   | 14    | High            | Local     |
| 2206 | YDL242W   | 48    | High            | Local     |
| 2207 | YDL241W   | 13    | High            | Local     |
| 2208 | YDL237W   | 11    | High            | Local     |
| 2209 | YDL236W   | 14    | High            | Local     |
| 2210 | YDL234C   | 13    | High            | Local     |
| 2211 | YDL231C   | 13    | High            | Local     |
| 2212 | YDL230W   | 24    | High            | Local     |
| 2213 | YDL229W   | 5     | High            | Local     |
| 2214 | YDL228C   | 40140 | High            | Global    |
| 2215 | YDL227C   | 20    | High            | Local     |
| 2216 | YDL225W   | 11    | High            | Local     |

**Figure S6.** Filter highly and lowly expressed genes result file (thresholding approach

LT1) To perform this test case run files from the *Scripts* folder of *IgemRNA* tool:

## Supplementary file S2

*TestCase\_findHighlyLowlyExpressedGenesGT1.m*

*TestCase\_findHighlyLowlyExpressedGenesLT1.m*

*TestCase\_findHighlyLowlyExpressedGenesLT2.m*

Or run full tests from the root folder of *IgemRNA*:

*ShortTest.m*

*LongTest.m*

### 5.2. Filter lowly expressed genes

Non-optimization task *Filter lowly expressed genes* generates separate excel result files for each dataset provided in transcriptomics data file. These result files contain filtered gene lists including genes that are below a given threshold based on the selected thresholding approach. File names include dataset and phenotype name (from transcriptomics data file), thresholding approach (GT1, LT1, LT2) name and provided global threshold values (Figure S7).

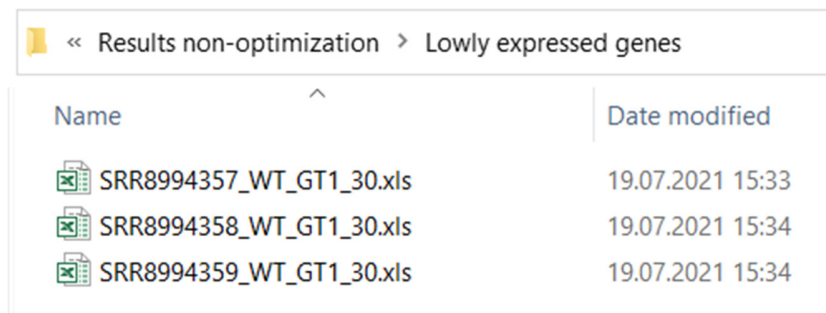

| « Results non-optimization » Lowly expressed genes                                                           |                  |
|--------------------------------------------------------------------------------------------------------------|------------------|
| Name                                                                                                         | Date modified    |
|  SRR8994357_WT_GT1_30.xls | 19.07.2021 15:33 |
|  SRR8994358_WT_GT1_30.xls | 19.07.2021 15:34 |
|  SRR8994359_WT_GT1_30.xls | 19.07.2021 15:34 |

**Figure S7.** Non-optimization results folder

The result for lowly expressed genes coincides with the provided transcriptomics data format. Each file consists of 4 columns *GeneId*, *Data* (expression value from transcriptomics data), *ExpressionLevel* (Low) and *ThApplied* to show whether a global or local threshold was applied. Only those genes that are below a given threshold (depending on which thresholding approach is applied) are listed in the result files. The test case provided for this task shows genes with expression level below 30 using the Local T2 approach (Figure S8).

## Supplementary file S2

|    | A         | B    | C               | D         |
|----|-----------|------|-----------------|-----------|
| 1  | GeneId    | Data | ExpressionLevel | ThApplied |
| 2  | YDL248W   | 0    | Low             | Global    |
| 3  | YDL247W-A | 0    | Low             | Global    |
| 4  | YDL247W   | 2    | Low             | Global    |
| 5  | YDL246C   | 2    | Low             | Global    |
| 6  | YDL245C   | 6    | Low             | Local     |
| 7  | YDL244W   | 0    | Low             | Global    |
| 8  | YDL240C-A | 2    | Low             | Global    |
| 9  | YDL239C   | 0    | Low             | Global    |
| 10 | YDL238C   | 1    | Low             | Global    |
| 11 | YDL233W   | 2    | Low             | Global    |
| 12 | YDL232W   | 1    | Low             | Global    |
| 13 | YDL224C   | 0    | Low             | Global    |
| 14 | YDL219W   | 5    | Low             | Local     |
| 15 | YDL214C   | 34   | Low             | Local     |
| 16 | tG(GCC)D1 | 0    | Low             | Global    |
| 17 | YDL210W   | 10   | Low             | Local     |

**Figure S8.** Lowly expressed genes result file

To perform this test case run files from the *Scripts* folder of *IgemRNA* tool:

*TestCase\_findGenesBelowThresholdGT1.m*

*TestCase\_findGenesBelowThresholdLocal1.m*

*TestCase\_findGenesBelowThresholdLocal2.m*

Or run full tests from the root folder of *IgemRNA*:

*ShortTest.m*

*LongTest.m*

### 5.3. Filter up/down regulated genes between phenotypes

Non-optimization task *Filter up/down regulated genes between phenotypes* generates result excel files in the *Gene expression level comparison* folder. Result file names contain dataset and phenotype names for both transcriptomics datasets that have been compared (Figure S9).

|                                                                                                                                   |                  |
|-----------------------------------------------------------------------------------------------------------------------------------|------------------|
| << Results non-optimizati... > Gene expression level comparison                                                                   |                  |
| Name                                                                                                                              | Date modified    |
|  SRR8994378_S47D_compared_to_SRR8994357_WT.xls | 23.07.2021 08:52 |

**Figure S9.** Up/Down regulated genes in comparison to another phenotype

These result excel data files contain a full gene list from the target dataset and the corresponding genes that are found in the source dataset (Figure S10A column). Expression values for both target and source dataset are displayed (Figure S10B, C columns) as well as the determined up/down regulation status (Figure S10D column).

## Supplementary file S2

|    | A         | B                                       | C                                     | D                 |
|----|-----------|-----------------------------------------|---------------------------------------|-------------------|
| 1  | GenelD    | SRR8994378_S47D_ExpressionValue(target) | SRR8994357_WT_ExpressionValue(source) | Up/Down regulated |
| 2  | YDL248W   | 1                                       | 0                                     | up                |
| 3  | YDL247W-A | 0                                       | 1                                     | down              |
| 4  | YDL247W   | 0                                       | 0                                     | equal             |
| 5  | YDL246C   | 5                                       | 0                                     | up                |
| 6  | YDL245C   | 10                                      | 14                                    | down              |
| 7  | YDL244W   | 6                                       | 3                                     | up                |
| 8  | YDL243C   | 25                                      | 3                                     | up                |
| 9  | YDL242W   | 64                                      | 48                                    | up                |
| 10 | YDL241W   | 20                                      | 13                                    | up                |
| 11 | YDL240C-A | 1                                       | 1                                     | equal             |
| 12 | YDL240W   | 9                                       | 0                                     | up                |
| 13 | YDL239C   | 0                                       | 2                                     | down              |
| 14 | YDL238C   | 5                                       | 0                                     | up                |
| 15 | YDL237W   | 13                                      | 11                                    | up                |
| 16 | YDL236W   | 10                                      | 14                                    | down              |
| 17 | YDL235C   | 12                                      | 6                                     | up                |
| 18 | YDL234C   | 134                                     | 13                                    | up                |

**Figure S10.** Up/Down regulated genes in comparison to another phenotype result file

To perform this test case run the file *TestCase\_findUpDownRegulatedGenes.m* in the *Scripts* folder of *IgemRNA* tool or run full tests from the root folder of *IgemRNA*:

*ShortTest.m*

*LongTest.m*

## 6. Post-optimization tasks

Context-specific models generated by *IgemRNA* post-optimization tasks as well as the results of the analysis performed on these models are saved in the *Results post-optimization* folder of *IgemRNA* tool (Figure S11). The post-optimization tasks are saved in the folders with the corresponding name: Flux-shifts, Non-flux reactions and Rate limiting reactions (for more details see section Materials and Methods 2.2 Tools functionality description).

| « 2021-10-20 (IgemRNA) » Results post-optimization |                  |
|----------------------------------------------------|------------------|
| Name                                               | Date modified    |
| Context-specific models                            | 26.10.2021 17:36 |
| Flux-shifts                                        | 26.10.2021 17:36 |
| Minimum requirements                               | 26.10.2021 17:36 |
| Non-flux reactions                                 | 26.10.2021 17:36 |
| Rate limiting reactions                            | 26.10.2021 17:36 |

**Figure S11.** Results folder after post-optimization task execution

To generate context-specific models used for these test cases run the file *TestCase\_createContextSpecificModel.m* in the *Scripts* folder of *IgemRNA* tool. Since this script takes a long time to execute, the context-specific model files used for this demonstration have already been provided in the 'Results post-optimization/Context-specific models' folder.

### 6.1. Filter non-flux reactions

Post-optimization task *filter non-flux reactions* performs an analysis on the created context-specific models of the same phenotype, the name of the phenotype is included in the result file name (Figure S12). This analysis filters those reactions that carry no flux.



## Supplementary file S2

| « IgemRNA > Results post-optimization > Non-flux reactions                                                    |                  |
|---------------------------------------------------------------------------------------------------------------|------------------|
| Name                                                                                                          | Date modified    |
|  non-flux reactions_S47D.xls | 17.07.2021 09:12 |
|  non-flux reactions_WT.xls   | 15.07.2021 17:18 |

Figure S12. Non-flux reactions result folder

Each result excel file contains a list for each transcriptomics dataset of reactions that carry no flux in the result context-specific model created by integration of the supplied transcriptomics data into the provided model. An additional sheet for all the common non-flux reactions of the same phenotype is also provided in the sheet *Common (phenotype name)* (Figure S13).

|    | A         | B             | C         | D             | E         | F             | G         | H          | I                              | J           | K         | L      | M      | N       | O       |
|----|-----------|---------------|-----------|---------------|-----------|---------------|-----------|------------|--------------------------------|-------------|-----------|--------|--------|---------|---------|
| 1  | Abbreviat | Descriptio    | Reaction  | GPR           | Lower bou | Upper bou     | Objective | Subsystem  | Notes                          | EC Numbe    | Reference | FBAMin | FBAMax | MinFlux | MaxFlux |
| 2  | r_0312    | cysteine sy   | s_0841[c] | YLR303W_      | 0         | 0             | 0         | sce00270   | NOTES: m                       | 2.5.1.47; 2 | 21623372; | 0      | 0      | 0       | 0       |
| 3  | r_0475    | glutaminas    | s_0803[c] | ( YFL060C_    | 0         | 0             | 0         |            |                                |             | 3309138   | 0      | 0      | 0       | 0       |
| 4  | r_0680    | L-asparagi    | s_0805[e] | ( YLR155C_    | 0         | 0             | 0         |            |                                | 3.5.1.1     | 3042786   | 0      | 0      | 0       | 0       |
| 5  | r_0812    | O-acetylhc    | s_1150[c] | YLR303W_      | 0         | 0             | 0         | sce00270   | Cysteine ar                    | 2.5.1.47; 2 | 15042590  | 0      | 0      | 0       | 0       |
| 6  | r_0813    | O-acetylhc    | s_0841[c] | YLR303W_      | 0         | 0             | 0         | sce00270   | NOTES: m                       | 2.5.1.47; 2 | 15042590  | 0      | 0      | 0       | 0       |
| 7  | r_1250    | putrescine    | s_1389[c] | YKL174C       | 0         | 0             | 0         |            |                                |             | 15668236  | 0      | 0      | 0       | 0       |
| 8  | r_1259    | spermidine    | s_1439[c] | YKL174C       | 0         | 0             | 0         |            |                                |             | 15668236  | 0      | 0      | 0       | 0       |
| 9  | r_1663    | bicarbonat    | s_0446[e] | ->            | 0         | 0             | 0         |            |                                |             |           | 0      | 0      | 0       | 0       |
| 10 | r_4062    | lipid backb   | s_3746[c] | ->            | 0         | 0             | 0         |            | NOTES: pseudo-reaction part of |             |           | 0      | 0      | 0       | 0       |
| 11 | r_4064    | lipid chain   | s_3747[c] | ->            | 0         | 0             | 0         |            | NOTES: pseudo-reaction part of |             |           | 0      | 0      | 0       | 0       |
| 12 | r_4211    | D-ribose 5    | s_0764[c] | ( YFL060C_    | 0         | 0             | 0         |            | NOTES: ad 4.3.3.6; 3.5.1.2     |             |           | 0      | 0      | 0       | 0       |
| 13 | antr_deme | anthranila    | s_0427[c] | ->            | 0         | 0             | 0         | artificial |                                |             |           | 0      | 0      | 0       | 0       |
| 14 | N5_antr_s | phosphori     | s_1187[c] | ->            | 0         | 0             | 0         | artificial |                                |             |           | 0      | 0      | 0       | 0       |
| 15 | carbo_1Df | 1-(2-carbo    | s_0076[c] | ->            | 0         | 0             | 0         | artificial |                                |             |           | 0      | 0      | 0       | 0       |
| 16 |           |               |           |               |           |               |           |            |                                |             |           |        |        |         |         |
|    |           | SRR8994357_WT |           | SRR8994358_WT |           | SRR8994359_WT |           | Common_WT  |                                |             |           |        |        |         |         |

Figure S13. Wild type non-flux reaction task result

To perform this test case run the file *TestCase\_filterNonFluxReactions.m* in the *Scripts* folder of *IgemRNA* tool or run full tests from the root folder of *IgemRNA*:

*ShortTest.m*

*LongTest.m*

### 6.2. Filter rate limiting reactions

Post-optimization task *filter rate limiting reactions* performs analysis on the generated context-specific models of the same phenotype, the phenotype name is included in the result files (Figure S14).

| « Results post-optimization > Rate limiting reactions                                                                |                  |
|----------------------------------------------------------------------------------------------------------------------|------------------|
| Name                                                                                                                 | Date modified    |
|  rate_limiting_reactions_S47D.xls | 17.07.2021 09:34 |
|  rate_limiting_reactions_WT.xls   | 17.07.2021 09:17 |

Figure S14. Rate limiting reactions result folder



## Supplementary file S2

Each result file contains sheets for each provided transcriptomics dataset of the same phenotype that has been integrated in the supplied model creating context-specific models. An analysis on these context-specific models have been performed in order to filter reactions that have reached the maximal flux (MaxFlux calculated by FVA) based on the upper bound set according to transcriptomics data and GPR associations. An additional sheet for common rate limiting reactions has also been added to the result file where rate limiting reactions that are present in all datasets are listed (Figure S15).

|   | A         | B           | C                     | D   | E         | F         | G         | H         | I                               | J        | K         | L      | M      | N       | O       |
|---|-----------|-------------|-----------------------|-----|-----------|-----------|-----------|-----------|---------------------------------|----------|-----------|--------|--------|---------|---------|
| 1 | Abbreviat | Description | Reaction              | GPR | Lower bou | Upper bou | Objective | Subsystem | Notes                           | EC Numbe | Reference | FBAMin | FBAMax | MinFlux | MaxFlux |
| 2 | r_4046    | non-growt   | s_0434[c] + s_0803[c] | 0.7 | 0.7       | 0         |           |           |                                 |          |           | 0,7    | 0,7    | 0,7     | 0,7     |
| 3 | r_1761    | ethanol ex  | s_0681[e] ->          |     | 8         | 12        | 0         |           | NOTES: added after the Biolog u |          |           | 8      | 8      | 8       | 12      |
| 4 |           |             |                       |     |           |           |           |           |                                 |          |           |        |        |         |         |

**Figure S15.** S47D phenotype rate limiting reaction task result

To perform this test case run the file *TestCase\_filterRateLimitingReactions.m* in the *Scripts* folder of *IgemRNA* tool or run full tests from the root folder of *IgemRNA*:

*ShortTest.m*

*LongTest.m*

### 6.3. Flux shifts calculation between different phenotypes

Post-optimization task *calculate flux shifts between phenotypes* compares flux values (calculated by FVA on the context-specific models) between two different phenotypes. In this demonstration flux shifts analysis task was performed on the S47D phenotype datasets using Global T1 thresholding approach with the lower global threshold value of 0, phenotype SRR8994358\_WT was compared to the wild type dataset SRR8994357\_WT of the same thresholding approach and threshold values (Figure S16).

| « Results post-optimization » Flux-shifts                                                                           |                  |
|---------------------------------------------------------------------------------------------------------------------|------------------|
| Name                                                                                                                | Date modified    |
|  SRR8994378_S47D_flux_shifts.xls | 26.10.2021 17:31 |

**Figure S16.** Flux-shifts result folder

Each result file contains a full reaction list that corresponds to the 'Reaction List' sheet in the provided model file as well as additional columns for the calculation results: *MinFlux* and *MaxFlux* values (phenotype that is compared, Figure S17L, M columns), *MinFlux/MaxFlux(dataset name)\_(phenotype name)* phenotype that is used for comparison (Figure S17N, O columns) and the *MinFlux/MaxFlux ratio* between these two phenotypes (Figure S17P, Q columns).

## Supplementary file S2

|    | A         | B                     | C         | D       | E        | F           | L       | M       | N                     | O                     | P            | Q            |
|----|-----------|-----------------------|-----------|---------|----------|-------------|---------|---------|-----------------------|-----------------------|--------------|--------------|
| 1  | Abbreviat | Descriptio            | Reaction  | GPR     | LowerBou | UpperBou    | MinFlux | MaxFlux | MinFlux_SRR8994357_WT | MaxFlux_SRR8994357_WT | MinFluxRatio | MaxFluxRatio |
| 2  | r_0001    | (R)-lactate s_0025[c] | (( YDL174 | 0       | 51       | 0           | 43.2    | 0       | 0                     | 33                    | 1            | 1,309091     |
| 3  | r_0002    | (R)-lactate s_0027[m] | (( YDL178 | 0       | 41       | 0           | 41      | 0       | 0                     | 3                     | 1            | 13,666667    |
| 4  | r_0003    | (R,R)-buta s_0035[c]  | YAL060W   | -1000   | 1000     | -8.2        | 0       | 0       | -1,200001             | 0                     | 6,833328     | 1            |
| 5  | r_0004    | (S)-lactate s_0063[c] | (( YEL039 | 0       | 51       | 0           | 16      | 0       | 0                     | 5                     | 1            | 3,2          |
| 6  | r_0005    | 1,3-beta-g s_1543[c]  | ( YGR032  | 0       | 339      | 0           | 0       | 0       | 0                     | 0,245197              | 1 down       |              |
| 7  | r_0006    | 1,6-beta-g s_1543[c]  | ( YGR143  | 0       | 339      | 0           | 0       | 0       | 0                     | 0,081925              | 1 down       |              |
| 8  | r_0007    | 1-(5-phos             | s_0077[c] | YIL020C | 0        | 21          | 0       | 8       | 0                     | 1                     | 1            | 8            |
| 9  | r_0012    | 1-pyrroline s_0119[m] | YHR037W   | -1000   | 1000     | 2,269823e16 | 16      | 0       | 0                     | 10                    | 1            | 1,6          |
| 10 | r_0013    | 2,3-diketo- s_0311[c] | ( YEL038V | 0       | 2        | 0           | 1       | 0       | 0                     | 1                     | 1            | 1            |
| 11 | r_0014    | 2,5-diamin s_0142[c]  | YOL066C   | 0       | 79       | 0           | 0       | 0       | 0                     | 0,000328              | 1 down       |              |
| 12 | r_0015    | 2,5-diamin s_0141[c]  | YBR153W   | 0       | 1        | 0           | 0       | 0       | 0                     | 0,000328              | 1 down       |              |
| 13 | r_0016    | 2-aceto-2- s_0179[m]  | (( YCL009 | 0       | 13       | 0           | 7       | 0       | 0                     | 2                     | 1            | 3,5          |
| 14 | r_0017    | 2-amino-4- s_0148[m]  | YNL256W   | 0       | 141      | 0           | 0       | 0       | 0                     | 0,000021              | 1 down       |              |
| 15 | r_0018    | 2-aminoad s_0176[c]   | ( YER152  | -1000   | 1000     | 0           | 0       | 0       | 0                     | 1,8                   | 1 down       |              |

**Figure S17.** Reaction flux-shifts between two phenotypes

To perform this test case run the file *TestCase\_calculateFluxShifts.m* in the *Scripts* folder of *IgemRNA* tool or run full tests from the root folder of *IgemRNA*:

*ShortTest.m*

*LongTest.m*.

Most genome scale metabolic models use biomass objective function to simulate biomass accumulation rates, but in many cases such, *S. cerevisiae* Yeast\_8\_4 version models have a specific wild type function. Optimizing different mutant strain models with deletions and/or specific omics data integration (like transcriptomics data), can yield infeasible optimization solutions although experimental conditions show the opposite. *IgemRNA* has functionality to remove biomass objective function from a model and apply flux distribution with transcriptome and/or medium data sets and analyze results.

## 7. Nomenclature of file names

*IgemRNA* also provides standardized output file naming for easier filtering of analysis datasets (Table S1).

**Table S1.** File name nomenclature.

|                         | Dataset and Phenotype Name                           | Thresholding Approach                                                                                             | Global Threshold Values                                                                         |
|-------------------------|------------------------------------------------------|-------------------------------------------------------------------------------------------------------------------|-------------------------------------------------------------------------------------------------|
| Source                  | Sheet name in transcriptomics data file (Figure S1B) | Based on the selected thresholding approach in the <i>IgemRNA</i> form section B (Figure S3.)                     | Based on the provided global threshold values in the <i>IgemRNA</i> form section C (Figure S3.) |
| Example/Possible values | SRR8994357_WT                                        | <ul style="list-style-type: none"> <li>GT1 (Global T1)</li> <li>LT1 (Local T1)</li> <li>LT2 (Local T2)</li> </ul> | <ul style="list-style-type: none"> <li>30 (GT1, LT1)</li> <li>30_100 (LT2)</li> </ul>           |
