# Supplementary material for: Integrative Gene Expression and Metabolic Analysis Tool IgemRNA
Source: MDPI journal article supplement (doi:10.3390/biom12040586), 2022-04-16
Supplement: s1 [file s1]

## Supplementary file S1

### Supplementary file S1

#### Classifying previously published transcriptome data integration in GSM methods

**Table S1.** Comparison of methods for transcription data integration

| Name                                                           | Year | Returns a context - specific model | Thresholding                                                             | Gene mapping                                                                                                                         | Data Requirements                                                                                                                                                                                           | Is maintained nowadays | Availability in third party software |
|----------------------------------------------------------------|------|------------------------------------|--------------------------------------------------------------------------|--------------------------------------------------------------------------------------------------------------------------------------|-------------------------------------------------------------------------------------------------------------------------------------------------------------------------------------------------------------|------------------------|--------------------------------------|
| Akesson                                                        | 2003 | No                                 | Yes, one user-specified threshold                                        | Not found                                                                                                                            | A genome-scale metabolic network reconstruction.                                                                                                                                                            | No                     | Not found                            |
| Gene Inactivity Moderated by Metabolism and Expression (GIMME) | 2008 | Yes                                | Yes, one user-specified threshold                                        | Expression data has to be mapped to reactions before calling the algorithm, can be done using Cobra Toolbox pre-processing functions | 1. A genome-scale metabolic network reconstruction,<br>2. specified objective function,<br>3. one threshold,<br>4. one gene expression data set,<br>5. calculated reaction expression levels (gene mapping) | Yes                    | MATLAB, Cobra Toolbox                |
| Integrative metabolic analysis tool (iMAT)                     | 2008 | Yes                                | Yes, two user-specified thresholds (lower threshold and upper threshold) | Expression data has to be mapped to reactions before calling the algorithm, can be done using Cobra Toolbox pre-processing functions | 1. A genome-scale metabolic network reconstruction,<br>2. two specified thresholds,<br>3. one expression data set,<br>4. calculated reaction expression levels (gene mapping)                               | Yes                    | MATLAB, Cobra Toolbox                |
| E-Flux                                                         | 2009 | Flux distribution only             | Yes, one user-specified threshold                                        | Not found                                                                                                                            | 1. A genome-scale metabolic network reconstruction,                                                                                                                                                         | Not found              | Not found                            |

## Supplementary file S1

|                                                                                     |      |                        |                                                              |                                                                           |                                                                                     |           |                                                                                                                |
|-------------------------------------------------------------------------------------|------|------------------------|--------------------------------------------------------------|---------------------------------------------------------------------------|-------------------------------------------------------------------------------------|-----------|----------------------------------------------------------------------------------------------------------------|
|                                                                                     |      |                        |                                                              |                                                                           | 2. a function to convert expression levels into an upper bound on fluxes,           |           |                                                                                                                |
|                                                                                     |      |                        |                                                              |                                                                           | 3. gene expression data,                                                            |           |                                                                                                                |
|                                                                                     |      |                        |                                                              |                                                                           | 4. threshold                                                                        |           |                                                                                                                |
| Probabilistic regulation of metabolism (PROM)                                       | 2010 | Flux distribution only | Yes, one predefined low threshold (default: 33rd percentile) | Not found                                                                 | 1. A genome-scale metabolic network reconstruction,                                 | Not found | Not found                                                                                                      |
|                                                                                     |      |                        |                                                              |                                                                           | 2. a range of expression data from various environmental and genetic perturbations, |           |                                                                                                                |
|                                                                                     |      |                        |                                                              |                                                                           | 5. transcriptional regulatory network                                               |           |                                                                                                                |
| Toolbox for Integrating Genome-scale Metabolism, Expression, and Regulation (TIGER) | 2011 | Yes                    | Facilitated GIMME, iMAT and MADE methods                     | Yes, converting GPR associations into mixed integer linear program (MILP) | 1. A genome-scale metabolic network reconstruction,                                 | Not found | Not found                                                                                                      |
|                                                                                     |      |                        |                                                              |                                                                           | 2. gene expression data,                                                            |           |                                                                                                                |
|                                                                                     |      |                        |                                                              |                                                                           | 3. transcriptional regulatory network                                               |           |                                                                                                                |
| Metabolic Adjustment by Differential Expression (MADE)                              | 2011 | Flux distribution only | No                                                           | Not found                                                                 | 4. A genome-scale metabolic network reconstruction,                                 | No        | Linux / Windows/ MacOSX                                                                                        |
|                                                                                     |      |                        |                                                              |                                                                           | 5. two or more gene expression data sets                                            |           | MATLAB (requires a mixed-integer linear program solver)                                                        |
|                                                                                     |      |                        |                                                              |                                                                           | 3. a mixed-integer linear program solver                                            |           | (The most recent version of MADE, along with other tools for integrating expression data, is available as part |

# Supplementary file S1

|                                                            |      |                        |                                                                                                                                |                                                                                                                                      |                                                                                                    |                                                |  |                                 |
|------------------------------------------------------------|------|------------------------|--------------------------------------------------------------------------------------------------------------------------------|--------------------------------------------------------------------------------------------------------------------------------------|----------------------------------------------------------------------------------------------------|------------------------------------------------|--|---------------------------------|
|                                                            |      |                        |                                                                                                                                |                                                                                                                                      |                                                                                                    |                                                |  | of the TIGER software package.) |
| Integrative Network Inference for Tissues algorithm (INIT) | 2012 | Yes                    | Yes, optional minimum flux threshold for expressed reactions (default 1e-8) and positive or negative weights for each reaction | Expression data has to be mapped to reactions before calling the algorithm, can be done using Cobra Toolbox pre-processing functions | 1. A genome-scale metabolic network reconstruction,<br>2. gene expression data                     | Yes                                            |  | MATLAB, Cobra Toolbox           |
| Lee-12                                                     | 2012 | Flux distribution only | Not found                                                                                                                      | Not found                                                                                                                            | 1. A genome-scale metabolic network reconstruction,<br>3. gene expression data                     | Not found                                      |  | Cobra Toolbox (MATLAB)          |
| Fang-12                                                    | 2012 | Flux distribution only | Not found                                                                                                                      | Not found                                                                                                                            | Not found                                                                                          | Not found                                      |  | Not found                       |
| RELATive CHange (RELATCH)                                  | 2012 | Flux distribution only | Not found                                                                                                                      | Not found                                                                                                                            | 2. Gene expression data,<br>3. fluxomic data from a reference state                                | Not found                                      |  | Not found                       |
| Temporal Expression-based Analysis of Metabolism (TEAM)    | 2012 | Flux distribution only | Yes, threshold determination using background M3D data set                                                                     | Not found                                                                                                                            | 1. Initial media composition data,<br>2. temporal gene expression data<br>1. temporal biomass data | Accessible but only for microarray experiments |  | Not found                       |
| Gene-expression FBA (GX-FBA)                               | 2012 | Flux distribution only | Not found                                                                                                                      | Not found                                                                                                                            | 3. Not found                                                                                       | Not found                                      |  | Not found                       |
| metabolic Context-specificity Assessed by Deterministic    | 2012 | Yes                    | Yes, uses a core set of reactions that should be active based on gene                                                          | Mapped protein staining data to reactions according to gene-reaction associations and set a reaction score                           | 1. A genome-scale metabolic network reconstruction,<br>2. gene expression data                     | Yes, code is open source                       |  | MATLAB, Cobra Toolbox           |

## Supplementary file S1

| Reaction<br>Evaluation<br>(mCADRE)                               |      |                                                                       | expression<br>evidence and a<br>sensitivity<br>parameter: ratio<br>cutoff                      |                                                                                                                                                                                                                                                                                           |                                                                                                                                                               |                                   |                          |  |
|------------------------------------------------------------------|------|-----------------------------------------------------------------------|------------------------------------------------------------------------------------------------|-------------------------------------------------------------------------------------------------------------------------------------------------------------------------------------------------------------------------------------------------------------------------------------------|---------------------------------------------------------------------------------------------------------------------------------------------------------------|-----------------------------------|--------------------------|--|
| Transcriptional<br>regulated flux<br>balance analysis<br>(TRFBA) | 2016 | Limits upper<br>bounds of<br>reactions and<br>predicts<br>growth rate | No                                                                                             | Yes                                                                                                                                                                                                                                                                                       | 1. A genome-scale metabolic<br>network reconstruction,<br>2. set of expression data for<br>various perturbations,<br>3. transcriptional regulatory<br>network | Yes,<br>code is<br>open<br>source | MATLAB,<br>Cobra Toolbox |  |
| $\Delta$ FBA<br>(deltaFBA)                                       | 2021 | Yes                                                                   | Yes,<br>one global<br>threshold                                                                | Using AND/OR =<br>MIN/MAX GPR rule                                                                                                                                                                                                                                                        | 1. A genome-scale metabolic<br>network reconstruction,<br>2. gene expression data from two<br>different conditions,<br>3. threshold                           | Yes                               | MATLAB,<br>Cobra Toolbox |  |
| IgemRNA                                                          | 2021 | Yes                                                                   | Yes,<br>possible thresholds:<br>1. Global T1 (GT1),<br>2. Local T1 (LT1),<br>3. Local T2 (LT2) | Included, possible<br>options:<br>1. Only irreversible<br>reactions,<br>2. All reactions,<br>3. Growth not affecting<br>gene deletion only,<br>4. Meet minimum<br>growth requirements,<br>5. AND/OR =<br>MIN/MAX,<br>6. AND/OR =<br>MIN/SUM,<br>7. AND/OR = GM/MAX,<br>8. AND/OR = GM/SUM | 3. A genome-scale metabolic<br>network reconstruction,<br>4. gene expression data,<br>5. external metabolite uptake data<br>(optional),<br>6. threshold/-s    | Yes                               | MATLAB,<br>Cobra Toolbox |  |
